# Supplementary material for: Carboxylate binding in polar solvents using pyridylguanidinium salts
Source: Royal Society of Chemistry journal article supplement (doi:10.1039/b700988g), 2007-01-01

**Carboxylate binding in polar solvents using pyridylguanidinium salts.**

**Richard J. Fitzmaurice, Francesca Gaggini, Natarajan Srinivasan,  
Jeremy D. Kilburn**

**ELECTRONIC SUPPLEMENTARY INFORMATION**

The synthesis and characterisation data of compounds **6 – 8, 20, 24, 29** and **31**

NMR and ITC Titration data for all binding studies reported in tables 1 and 2 in manuscript

***N-1-Methyl-3-cyanobenzamide 6.***

SOCl<sub>2</sub> (1.44 cm<sup>3</sup>, 20.4 mmol) was added to a solution of 3-cyanobenzoic acid **5** (1.5 g, 10.2 mmol) in CH<sub>3</sub>OH (15 cm<sup>3</sup>) at 4 °C, and the reaction stirred at reflux for 18 h. The solvent was removed *in vacuo* to yield a grey solid which was stirred in 40% MeNH<sub>2</sub>/H<sub>2</sub>O (12 cm<sup>3</sup>) and THF (6 cm<sup>3</sup>) for 18 h. The solvent was removed *in vacuo*, and the residue dissolved in EtOAc (30 cm<sup>3</sup>), washed with 1 M KHSO<sub>4</sub> (2 x 10 cm<sup>3</sup>) and brine (10 cm<sup>3</sup>), and dried (MgSO<sub>4</sub>). Removal of the solvent *in vacuo* and purification by column chromatography (5% CH<sub>3</sub>OH/CH<sub>2</sub>Cl<sub>2</sub>) gave amide **6** (895 mg, 5.59 mmol, 55%) as a white solid. mp 136-138 °C;  $\nu_{\max}$  (solid)/cm<sup>-1</sup> 3288s, 3085w, 3066w, 2970w, 2943w, 2230m, 1742w, 1631s, 1553s;  $\delta_{\text{H}}$  (400 MHz, CDCl<sub>3</sub>) 3.02 (3 H, d, *J* 5, CH<sub>3</sub>), 6.51 (1 H, br s, NH), 7.56 (1 H, t, *J* 8, Ar), 7.77 (1 H, dt, *J* 8 and 1, Ar), 8.01 (1 H, dt, *J* 8 and 1, Ar), 8.06 (1 H, t, *J* 1, Ar);  $\delta_{\text{C}}$  (75.5 MHz, CDCl<sub>3</sub>) 27.0 (CH<sub>3</sub>), 112.8 (C), 118.1 (C), 129.6 (CH), 130.7 (CH), 131.3 (CH), 134.6 (CH), 135.7 (C), 166.2 (C); *m/z* (EI) 159 ((M-H)<sup>+</sup>, 40%), 130 (80), 102 (100).

***N-1-Methyl-3-(aminomethyl)benzamide 7***

*N*-1-Methyl-3-cyanobenzamide **6** (756 mg, 4.73 mmol) and 10% Pd/C (cat.) in CH<sub>3</sub>OH (10 cm<sup>3</sup>) was stirred under a hydrogen atmosphere for 72 h. The solution was filtered, the solvent removed *in vacuo* and purified by column chromatography (4% NH<sub>3</sub> sat. CH<sub>3</sub>OH/CH<sub>2</sub>Cl<sub>2</sub>) to give amine **7** (658 mg, 4.02 mmol, 85%) as a waxy solid.  $\nu_{\max}$  (solid)/cm<sup>-1</sup> 3298w, 3072w, 2941w, 1629s, 1606s, 1580s, 1548s;  $\delta_{\text{H}}$  (400 MHz, CDCl<sub>3</sub>) 2.87 (3 H, d, *J* 5, CH<sub>3</sub>), 3.84 (2 H, s, CH<sub>2</sub>), 7.14 (1 H, br, NH), 7.39 (1 H, t, *J* 8, Ar), 7.48 (1 H, d, *J* 8, Ar), 7.63 (1 H, d, *J* 8, Ar), 7.77 (1 H, s, Ar);  $\delta_{\text{C}}$  (75.5 MHz, CDCl<sub>3</sub>) 25.2 (CH<sub>3</sub>), 45.2 (CH<sub>2</sub>), 124.4 (CH), 125.1 (CH), 127.8 (CH), 129.3 (CH), 134.5 (C), 144.1 (C), 167.1 (C); *m/z* (EI) 165 ((M+H)<sup>+</sup>, 100%); HRMS (ES) C<sub>9</sub>H<sub>13</sub>N<sub>2</sub>O (M+H)<sup>+</sup> requires 165.1022, found 165.1023.

***N-1-Methyl-3-(isothiocyanatomethyl)benzamide 8***

Amine **7** (86 mg, 0.43 mmol) was dissolved in CH<sub>2</sub>Cl<sub>2</sub> (1 cm<sup>3</sup>) at 4 °C and sat. K<sub>2</sub>CO<sub>3</sub> (0.5 cm<sup>3</sup>) was added. Thiophosgene (0.07 cm<sup>3</sup>, 0.92 mmol) was added to the organic phase and the reaction was vigorously stirred at room temperature for 3 h. CH<sub>2</sub>Cl<sub>2</sub> (8 cm<sup>3</sup>) and H<sub>2</sub>O (4 cm<sup>3</sup>) were added and the phases separated. The organic phase was washed with H<sub>2</sub>O (5 cm<sup>3</sup>), 2 M HCl (2 x 5 cm<sup>3</sup>) and brine (5 cm<sup>3</sup>), dried (MgSO<sub>4</sub>) and the solvent removed *in vacuo* to give isothiocyanate **8** (89 mg, 0.28 mmol, 67%) as a white solid. mp 98-100 °C;  $\nu_{\max}$  (solid)/cm<sup>-1</sup> 3307m, 3083w, 2946w, 2182m, 2103m, 1636s, 1546s;  $\delta_{\text{H}}$  (300 MHz, CDCl<sub>3</sub>) 3.00 (3 H, d, *J* 5, CH<sub>3</sub>), 4.73 (2 H, s, CH<sub>2</sub>), 6.67 (1 H, br, NH), 7.41-7.45 (2 H, m, Ar), 7.71-7.74 (2 H, m, Ar);  $\delta_{\text{C}}$  (100 MHz, CDCl<sub>3</sub>) 27.0

(CH<sub>3</sub>), 48.5 (CH<sub>2</sub>), 125.7 (CH), 126.8 (CH), 129.4 (CH), 129.8 (CH), 133.4 (C), 135.0 (C), 135.6 (C), 167.7 (C); *m/z* (CI) 207 ((M+H)<sup>+</sup>, 24%), 148 (100).

### ***N-2-Methyl-6-(aminomethyl)-2-pyridinecarboxamide 20***

Pyridyl ester **19**<sup>[10]</sup> (1.5 g, 4.84 mmol) was stirred in 40% MeNH<sub>2</sub>/H<sub>2</sub>O (15 cm<sup>3</sup>) for 18 h. The solvent was removed *in vacuo* and the resulting yellow oil purified by column chromatography (2-10% NH<sub>3</sub> sat. CH<sub>3</sub>OH/CH<sub>2</sub>Cl<sub>2</sub>) to give amine **20** (304 mg, 1.84 mmol, 39%) as a waxy solid. mp 105-107 °C;  $\nu_{\max}$  (solid)/cm<sup>-1</sup> 3285w, 3063w, 2926w, 1650s, 1589s, 1533s;  $\delta_{\text{H}}$  (300 MHz, CDCl<sub>3</sub>) 2.98 (3 H, d, *J* 5, CH<sub>3</sub>), 3.96 (2 H, br, CH<sub>2</sub>), 7.35 (1 H, d, *J* 8, pyr), 7.75 (1 H, t, *J* 8, pyr), 8.01 (1 H, d, *J* 8, pyr), 8.08 (1 H, br, NH);  $\delta_{\text{C}}$  (75.5 MHz, CDCl<sub>3</sub>) 26.1 (CH<sub>3</sub>), 47.5 (CH<sub>2</sub>), 120.3 (CH), 121.1 (CH), 123.8 (CH), 137.9 (C), 149.4 (C), 160.6 (C); *m/z* (ES) 166 ((M+H)<sup>+</sup>, 100%); HRMS (ES) C<sub>8</sub>H<sub>12</sub>N<sub>3</sub>O (M+H)<sup>+</sup> requires 166.0975, found 166.0975.

### ***Benzyl N-[(3-[(methylamino)carbonyl]benzylamino)carbo thioyl]carbamate 24***

CbzNCS (0.48 cm<sup>3</sup>, 2.5 mmol) was added to a stirred solution of amine **7** (500 mg, 2.5 mmol) and DIPEA (1.36 cm<sup>3</sup>, 7.5 mmol) in dry CH<sub>3</sub>CN (15 cm<sup>3</sup>), and the reaction was stirred for 18 h. The solvent was removed *in vacuo*, the crude was dissolved in EtOAc (60 cm<sup>3</sup>), washed with 1% HCl (3 x 10 cm<sup>3</sup>) and brine (10 cm<sup>3</sup>), dried (MgSO<sub>4</sub>) and the solvent removed *in vacuo* to yield thiourea **24** (884 mg, 2.5 mmol, 99%) as a yellow solid. Mp 147-149 °C;  $\nu_{\max}$  (solid)/cm<sup>-1</sup> 3311w, 2969w, 1735s, 1647m, 1541s;  $\delta_{\text{H}}$  (400 MHz, CDCl<sub>3</sub>) 2.89 (3 H, d, *J* 4, CH<sub>3</sub>), 4.98 (2 H, d, *J* 6, ArCH<sub>2</sub>NHC(S)), 5.30 (2 H, s, OCH<sub>2</sub>Ph), 7.44-7.59 (7 H, m, Ar), 7.82 (1 H, d, *J* 8, Ar), 7.89 (1 H, s, Ar), 8.52 (1 H, q, *J* 4, CH<sub>3</sub>NH), 10.35 (1 H, t, *J* 6, ArCH<sub>2</sub>NHC(S)), 11.31 (1 H, s, CbzNH);  $\delta_{\text{C}}$  (100 MHz, DMSO-d<sub>6</sub>) 26.2 (CH<sub>3</sub>), 47.7 (CH<sub>2</sub>), 66.8 (CH<sub>2</sub>), 125.7 (CH), 126.4 (CH), 127.9 (CH), 128.2 (CH), 128.3 (CH), 128.4 (CH), 130.1 (CH), 134.7 (C), 135.6 (C), 137.9 (C), 153.2 (C), 166.5 (C), 179.9 (C); *m/z* (ES) 380 ((M+Na)<sup>+</sup>, 100%); HRMS (ES) C<sub>18</sub>H<sub>19</sub>N<sub>3</sub>O<sub>3</sub>SNa (M+Na)<sup>+</sup> requires 380.1039, found 380.1036.

### ***Benzyl N-[(6-[(methylamino)carbonyl]-2-pyridylmethyl) amino]carbothioyl carbamate 29***

Amine **20** (100 mg, 0.52 mmol) was dissolved in dry CH<sub>2</sub>Cl<sub>2</sub> (1 cm<sup>3</sup>) under N<sub>2</sub>. CbzNCS (85 mg, 0.52 mmol) in dry CH<sub>2</sub>Cl<sub>2</sub> (7 cm<sup>3</sup>) was added and the reaction stirred for 4 h. Hexane (10 cm<sup>3</sup>) was added and the solid precipitate was isolated by filtration and purified by column chromatography (1-2% CH<sub>3</sub>OH/CH<sub>2</sub>Cl<sub>2</sub>) to give thiourea **29** (95 mg, 0.26 mmol, 51%) as a white solid. mp 193-195 °C;  $\nu_{\max}$  (solid)/cm<sup>-1</sup> 3368w, 3323w, 3273w, 1700s, 1657s, 1530s, 1504s;  $\delta_{\text{H}}$  (300 MHz, 1:1 CD<sub>3</sub>OD/CDCl<sub>3</sub>) 2.70 (3 H, s, CH<sub>3</sub>), 4.62 (2 H, s, CH<sub>2</sub>NHC(S)), 4.95 (2 H, s, PhCH<sub>2</sub>), 7.18 (1 H, d, *J*

7.5, Ar), 7.72 (1 H, d,  $J$  7.5, Ar), 7.61 (1 H, t,  $J$  7.5, Ar);  $\delta_{\text{C}}$  (100 MHz, DMSO) 26.1 (CH<sub>3</sub>), 49.1 (CH<sub>2</sub>), 79.5 (C), 120.5 (CH), 124.4 (CH), 128.1 (CH), 128.5 (CH), 128.7 (CH), 135.9 (CH), 138.9 (C), 148.9 (C), 154.0 (C), 154.6 (C), 164.1 (C), 167.2 (CH<sub>2</sub>);  $m/z$  (ES) 381 ((M+Na)<sup>+</sup>, 100%); HRMS (ES) C<sub>17</sub>H<sub>18</sub>N<sub>4</sub>O<sub>3</sub>SNa (M+Na)<sup>+</sup> requires 381.0992, found 381.0991.

***Benzyl {[3-(benzylamino)-3-oxopropyl]amino}carbonothioyl carbamate 31***

CbzNCS (0.300 cm<sup>3</sup>, 1.55 mmol) in CH<sub>2</sub>Cl<sub>2</sub> (2 cm<sup>3</sup>) was added to amine **15** (500 mg, 1.69 mmol) and dry TEA (0.475 cm<sup>3</sup>, 3.39 mmol) in dry CH<sub>2</sub>Cl<sub>2</sub> (8 cm<sup>3</sup>) and dry DMF (0.5 cm<sup>3</sup>) and the mixture was stirred for 24 h. The solvent was removed *in vacuo* and purification by column chromatography (50% EtOAc/petroleum ether) gave thiourea **31** (384 mg, 1.01 mmol, 65%) as a white solid. Mp 144-146 °C; (Found: C, 61.82; H, 5.77; N, 11.05 C<sub>19</sub>H<sub>21</sub>N<sub>3</sub>O<sub>3</sub>S requires C, 61.44; H, 5.78; N, 11.31%);  $\nu_{\text{max}}$  (solid)/cm<sup>-1</sup> 3290w, 3168w, 3018w, 2969w, 1737s, 1707s, 1634s, 1520s;  $\delta_{\text{H}}$  (400 MHz, CD<sub>3</sub>CN) 2.55 (2 H, t,  $J$  6, NHCH<sub>2</sub>CH<sub>2</sub>), 3.88 (2 H, dt,  $J$  6 and 6, NHCH<sub>2</sub>CH<sub>2</sub>), 4.34 (2 H, d,  $J$  6, NHCH<sub>2</sub>Ph), 5.17 (2 H, s, CH<sub>2</sub>O), 6.94 (1 H, br, NHCH<sub>2</sub>Ph), 7.21-7.41 (10 H, m, Ar), 8.91 (1 H, br, CbzNH), 10.06 (1 H, br, NHCH<sub>2</sub>CH<sub>2</sub>);  $\delta_{\text{C}}$  (100 MHz, CD<sub>3</sub>CN) 34.6 (CH<sub>2</sub>), 42.4 (CH<sub>2</sub>), 43.6 (CH<sub>2</sub>), 68.6 (CH<sub>2</sub>), 128.0 (CH), 128.3 (CH), 129.0 (CH), 129.4 (2 x CH), 129.6 (CH), 136.6 (C), 140.3 (C), 153.9 (C), 172.0 (C), 180.5 (C);  $m/z$  (ES) ESMS:  $m/z$  (%): 394 ((M+Na)<sup>+</sup>, 100); HRMS (ES) for C<sub>19</sub>H<sub>21</sub>N<sub>3</sub>O<sub>3</sub>S (M+Na)<sup>+</sup> requires 394.1196, found 394.1198.

**N1-Methyl-3-([(benzylamino)carbothioyl]aminomethyl)benzamide 9 and TBA acetate in DMSO**

*NMR data*

[Host]/mM            3.2                            Starting volume/ $\mu$ L    600

[Guest]/mM           31.9                             $K_a$ (average)/ $M^{-1}$     260

| Volume added<br>/ $\mu$ L | MeNH         | Thiourea-NH  |
|---------------------------|--------------|--------------|
| 0                         | 8.7008       | 8.3901       |
| 20                        | 8.7278       | 8.5944       |
| 40                        | 8.7556       | 8.8637       |
| 50                        | 8.7668       | 8.9598       |
| 60                        | 8.7715       | 9.0718       |
| 70                        | 8.7826       | 9.1568       |
| 80                        | 8.7922       | 9.2330       |
| 90                        | 8.8009       | 9.2990       |
| 100                       | 8.8048       | 9.3641       |
| 120                       | 8.8120       | 9.4817       |
| 150                       | 8.8192       | 9.6215       |
| 200                       | 8.8343       | 9.7692       |
| 300                       | 8.8541       | 9.9686       |
| 400                       | 8.8645       | 10.0743      |
| 500                       | 8.8788       | 10.1243      |
| 580                       | 8.8748       | 10.1855      |
| $K_a$                     | $310 M^{-1}$ | $210 M^{-1}$ |

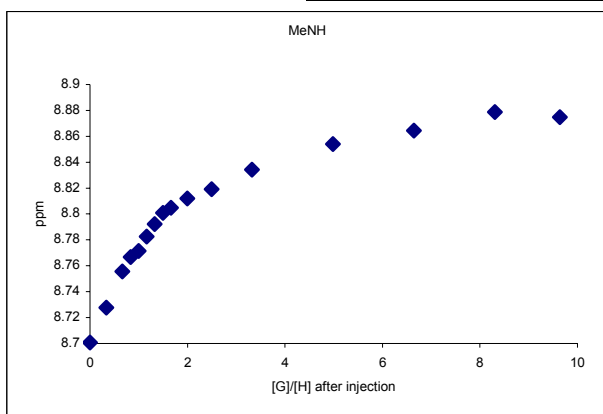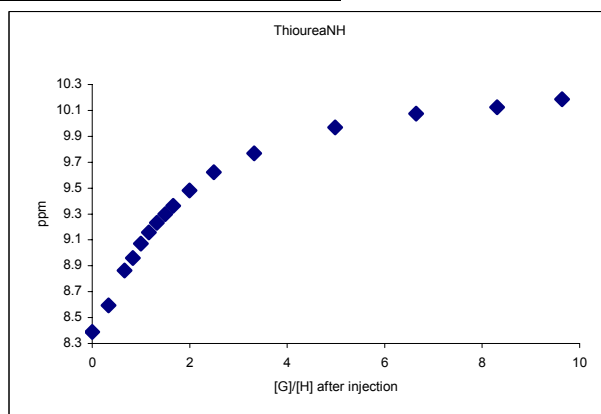

*ITC data*

|                     |      |                               |       |
|---------------------|------|-------------------------------|-------|
| [Host]/mM           | 1.95 | $\Delta H/\text{kJmol}^{-1}$  | -6.87 |
| [Guest]/mM          | 78.0 | $T\Delta S/\text{kJmol}^{-1}$ | 8.49  |
| $K_a/\text{M}^{-1}$ | 440  | $\Delta G/\text{kJmol}^{-1}$  | -15.3 |

| [G]/[H] after injection | cal/mol of injected G |
|-------------------------|-----------------------|
| 0.13                    | --                    |
| 0.27                    | -781.41               |
| 0.40                    | -698.36               |
| 0.53                    | -615.29               |
| 0.67                    | -548.76               |
| 0.80                    | -493.96               |
| 0.94                    | -443.26               |
| 1.08                    | -398.98               |
| 1.21                    | -367.24               |
| 1.35                    | -333.39               |
| 1.49                    | -304.26               |
| 1.63                    | -280.81               |
| 1.76                    | -259.72               |
| 1.90                    | -242.64               |
| 2.04                    | -223.40               |
| 2.18                    | -207.33               |
| 2.32                    | -190.30               |
| 2.46                    | -175.59               |
| 2.60                    | -164.96               |
| 2.75                    | -155.46               |
| 2.89                    | -150.08               |
| 3.03                    | -140.34               |
| 3.17                    | -134.81               |
| 3.32                    | -126.95               |
| 3.46                    | -122.20               |
| 3.61                    | -122.75               |
| 3.75                    | -113.94               |
| 3.90                    | -106.49               |
| 4.04                    | -94.75                |
| 4.19                    | -88.91                |
| 4.33                    | -86.30                |
| 4.48                    | -85.77                |
| 4.63                    | -83.09                |
| 4.78                    | -77.36                |
| 4.93                    | -70.92                |
| 5.07                    | -67.20                |
| 5.22                    | -65.93                |
| 5.37                    | -63.66                |
| 5.52                    | -61.58                |
| 5.67                    | -57.44                |

---

|      |        |
|------|--------|
| 5.83 | -56.98 |
| 5.98 | -48.93 |
| 6.13 | -49.32 |
| 6.28 | -49.68 |
| 6.43 | -47.52 |
| 6.59 | -45.78 |
| 6.74 | -48.63 |
| 6.90 | -48.32 |
| 7.05 | -43.65 |
| 7.21 |        |

---

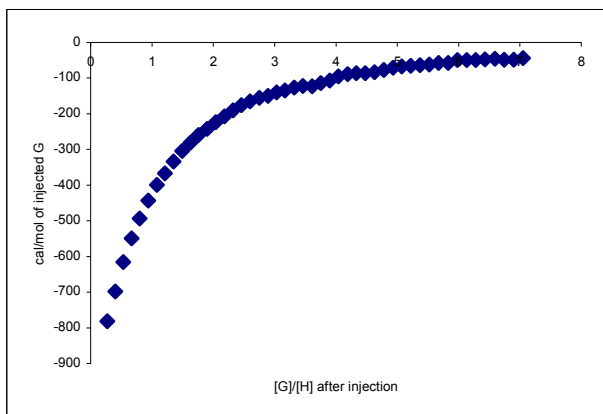

**N1-Methyl-3-[(2-(benzylamino)-2-oxoethyl]aminocarbothioyl)amino]methyl benzamide 10  
 and TBA acetate in DMSO**

*NMR data*

[Host]/mM            4.5                                    Starting volume/ $\mu$ L    600

[Guest]/mM           27.0                                         $K_a$ (average)/ $M^{-1}$     290

| Volume added<br>/ $\mu$ L | ArCH <sub>2</sub> NHC(S) | NHCH <sub>2</sub> Ph |
|---------------------------|--------------------------|----------------------|
| 0                         | 8.5729                   | 7.9847               |
| 20                        | 8.7262                   | 8.2059               |
| 40                        | 8.8494                   | 8.3823               |
| 50                        | 8.9082                   | 8.4681               |
| 60                        | 8.9550                   | 8.5364               |
| 70                        | 9.0003                   | 8.5968               |
| 80                        | 9.0384                   | 8.6603               |
| 90                        | 9.0853                   | 8.7302               |
| 100                       | 9.1123                   | 8.8025               |
| 110                       | 9.1353                   |                      |
| 120                       | 9.1703                   |                      |
| 130                       | 9.2108                   | 8.8949               |
| 150                       | 9.2497                   | 8.9598               |
| 175                       | 9.3045                   | 9.0392               |
| 200                       | -                        | 9.1052               |
| 250                       | 9.4197                   | 9.2132               |
| 300                       | 9.4706                   | 9.2839               |
| 400                       | 9.5564                   | 9.4173               |
| 500                       | 9.5945                   | 9.4841               |
| 600                       | 9.6032                   | 9.4817               |
| $K_a$                     | 278 $M^{-1}$             | 293 $M^{-1}$         |

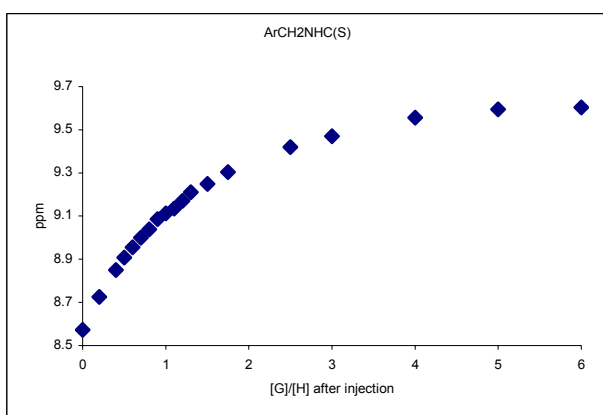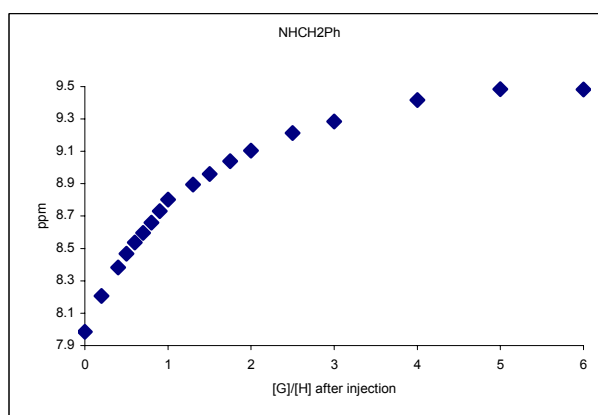



*ITC data*

|                     |      |                               |       |
|---------------------|------|-------------------------------|-------|
| [Host]/mM           | 1.96 | $\Delta H/\text{kJmol}^{-1}$  | -6.32 |
| [Guest]/mM          | 78.0 | $T\Delta S/\text{kJmol}^{-1}$ | 7.15  |
| $K_a/\text{M}^{-1}$ | 230  | $\Delta G/\text{kJmol}^{-1}$  | -13.5 |

| [G]/[H] after injection | cal/mol of injected G |
|-------------------------|-----------------------|
| 0.13                    | 783.99                |
| 0.27                    | 1368.73               |
| 0.40                    | 1271.58               |
| 0.54                    | 1185.35               |
| 0.67                    | 1112.47               |
| 0.81                    | 1048.42               |
| 0.95                    | 993.55                |
| 1.08                    | 946.24                |
| 1.22                    | 900.12                |
| 1.36                    | 860.56                |
| 1.50                    | 824.94                |
| 1.63                    | 789.31                |
| 1.77                    | 756.68                |
| 1.91                    | 726.68                |
| 2.05                    | 698.51                |
| 2.19                    | 676.04                |
| 2.33                    | 651.98                |
| 2.48                    | 628.11                |
| 2.62                    | 608.33                |
| 2.76                    | 589.39                |
| 2.90                    | 571.80                |
| 3.05                    | 559.45                |
| 3.19                    | 539.23                |
| 3.33                    | 526.00                |
| 3.48                    | 508.46                |
| 3.62                    | 496.26                |
| 3.77                    | 484.27                |
| 3.92                    | 469.81                |
| 4.06                    | 458.29                |
| 4.21                    | 444.12                |
| 4.36                    | 437.64                |
| 4.50                    | 423.80                |
| 4.65                    | 413.45                |
| 4.80                    | 401.58                |
| 4.95                    | 393.40                |
| 5.10                    | 384.75                |
| 5.25                    | 377.05                |
| 5.40                    | 367.95                |
| 5.55                    | 362.52                |
| 5.70                    | 354.75                |

---

|      |        |
|------|--------|
| 5.85 | 346.52 |
| 6.01 | 339.03 |
| 6.16 | 333.24 |
| 6.31 | 327.86 |
| 6.47 | 319.79 |
| 6.62 | 316.17 |
| 6.78 | 308.75 |
| 6.93 | 302.87 |
| 7.09 | 296.36 |
| 7.24 | 290.80 |

---

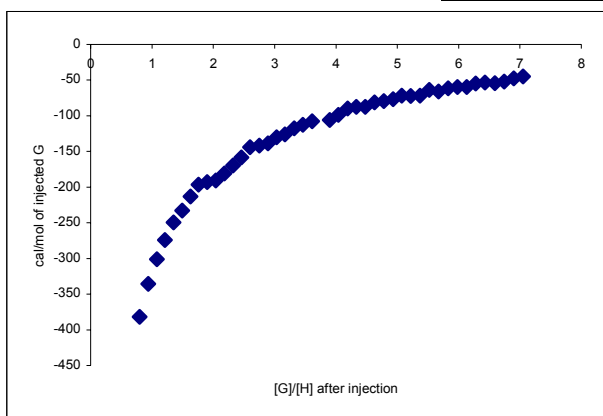

**N1-Methyl-3-[(3-(benzylamino)-3-oxopropyl]aminocarbothioyl)amino]methyl benzamide 11  
 and TBA acetate in DMSO**

*NMR data*

|            |      |                                     |     |
|------------|------|-------------------------------------|-----|
| [Host]/mM  | 4.3  | Starting volume/ $\mu\text{L}$      | 600 |
| [Guest]/mM | 26.0 | $K_a(\text{average})/\text{M}^{-1}$ | 200 |

| Volume added<br>/ $\mu\text{L}$ | Amide-NH             | ArCH <sub>2</sub> NHC(S) | NHCH <sub>2</sub> CH <sub>2</sub> |
|---------------------------------|----------------------|--------------------------|-----------------------------------|
| 0                               | 8.7199               | 8.3195                   | 7.8747                            |
| 20                              | 8.7350               | 8.4903                   | 8.0669                            |
| 40                              | 8.7493               | 8.6222                   | 8.2242                            |
| 50                              | 8.7533               | 8.6794                   | 8.2886                            |
| 60                              | 8.7572               | -                        | 8.3457                            |
| 70                              | 8.7628               | -                        | 8.4196                            |
| 80                              | 8.7660               | 8.8200                   | 8.4736                            |
| 90                              | 8.7699               | 8.8684                   | 8.5253                            |
| 100                             | 8.7707               | 8.9074                   | 8.5793                            |
| 120                             | 8.7771               | 8.9796                   | 8.6770                            |
| 150                             | 8.7834               | 9.0607                   | 8.7834                            |
| 200                             | 8.7961               | 9.1830                   | 8.8780                            |
| 300                             | 8.8104               | 9.3276                   | 9.0726                            |
| 400                             | 8.8152               | 9.4340                   | 9.1852                            |
| 500                             | 8.8255               | 9.5103                   | 9.2664                            |
| 580                             | 8.8295               | 9.5325                   | 9.3204                            |
| $K_a$                           | $183 \text{ M}^{-1}$ | $197 \text{ M}^{-1}$     | $218 \text{ M}^{-1}$              |

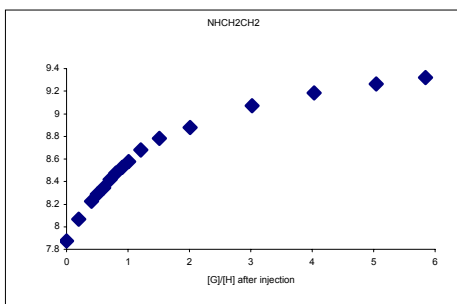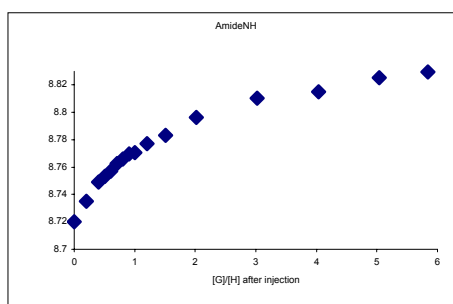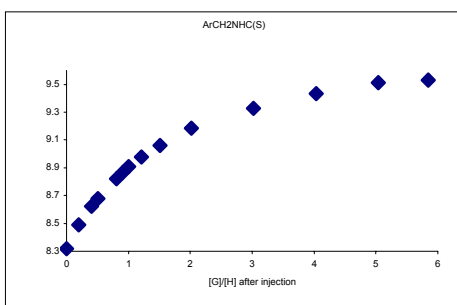

*ITC data*

|                     |      |                               |       |
|---------------------|------|-------------------------------|-------|
| [Host]/mM           | 1.95 | $\Delta H/\text{kJmol}^{-1}$  | -8.67 |
| [Guest]/mM          | 78.0 | $T\Delta S/\text{kJmol}^{-1}$ | 5.19  |
| $K_a/\text{M}^{-1}$ | 270  | $\Delta G/\text{kJmol}^{-1}$  | -13.9 |

| [G]/[H] after injection | cal/mol of injected G |
|-------------------------|-----------------------|
| 0.14                    | --                    |
| 0.27                    | -692.88               |
| 0.41                    | -619.70               |
| 0.55                    | --                    |
| 0.69                    | -512.81               |
| 0.83                    | -483.13               |
| 0.97                    | -443.02               |
| 1.11                    | -406.63               |
| 1.25                    | -378.60               |
| 1.39                    | -344.55               |
| 1.53                    | -327.81               |
| 1.68                    | -303.30               |
| 1.82                    | -288.75               |
| 1.96                    | -274.67               |
| 2.11                    | -261.60               |
| 2.25                    | -244.19               |
| 2.39                    | -230.10               |
| 2.54                    | -213.23               |
| 2.68                    | -204.19               |
| 2.83                    | -191.17               |
| 2.98                    | -181.93               |
| 3.12                    | -171.88               |
| 3.27                    | -165.20               |
| 3.42                    | -160.51               |
| 3.57                    | -155.64               |
| 3.72                    | -147.81               |
| 3.87                    | -142.56               |
| 4.02                    | -139.18               |
| 4.17                    | -131.95               |
| 4.32                    | -122.69               |
| 4.47                    | -117.56               |
| 4.62                    | -112.44               |
| 4.77                    | -106.98               |
| 4.92                    | -99.11                |
| 5.08                    | -98.09                |
| 5.23                    | -97.72                |
| 5.38                    | -93.99                |
| 5.54                    | -89.19                |
| 5.69                    | -87.64                |

|      |        |
|------|--------|
| 5.85 | -86.69 |
| 6.00 | -81.74 |
| 6.16 | -76.64 |
| 6.32 | -77.73 |
| 6.47 | -70.25 |
| 6.63 | -67.17 |
| 6.79 | -64.72 |
| 6.95 | -59.26 |
| 7.11 | -57.58 |
| 7.27 | -55.85 |
| 7.43 | -55.24 |

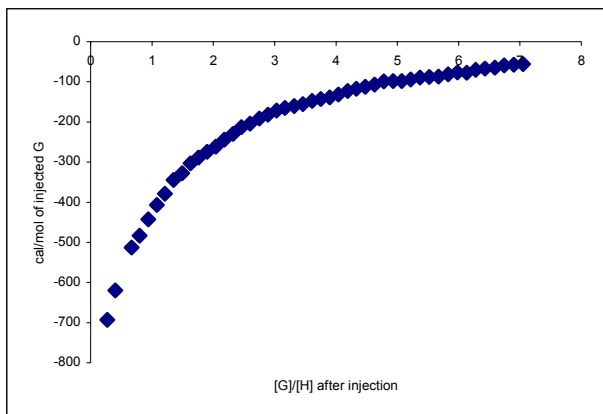

**N1-Benzyl-2-[(benzylamino)carbothioyl]aminoacetamide 12 and TBA acetate in DMSO**

*NMR data*

|            |      |                                     |     |
|------------|------|-------------------------------------|-----|
| [Host]/mM  | 3.7  | Starting volume/ $\mu\text{L}$      | 600 |
| [Guest]/mM | 22.4 | $K_a(\text{average})/\text{M}^{-1}$ | 230 |

| Volume added<br>/ $\mu\text{L}$ | PhCH <sub>2</sub> NHC(S) | NHCH <sub>2</sub> C(O) |
|---------------------------------|--------------------------|------------------------|
| 0                               | 8.5110                   | 7.9351                 |
| 20                              | 8.6826                   | 8.1440                 |
| 40                              | 8.8240                   | 8.3211                 |
| 50                              | 8.8859                   | 8.3926                 |
| 60                              | 8.9360                   | 8.4713                 |
| 70                              | 8.9900                   | 8.5292                 |
| 80                              | 9.0265                   | 8.5825                 |
| 90                              | 9.0742                   | 8.6405                 |
| 100                             | 9.1052                   | 8.6633                 |
| 120                             | 9.1774                   | 8.7509                 |
| 150                             | 9.2577                   | 8.8597                 |
| 200                             | 9.3689                   | 9.0027                 |
| 300                             | 9.5150                   | 9.1854                 |
| 400                             | 9.5421                   | 9.2211                 |
| 500                             | 9.6549                   | 9.3601                 |
| 580                             | 9.6787                   | 9.3967                 |
| $K_a$                           | $237 \text{ M}^{-1}$     | $225 \text{ M}^{-1}$   |

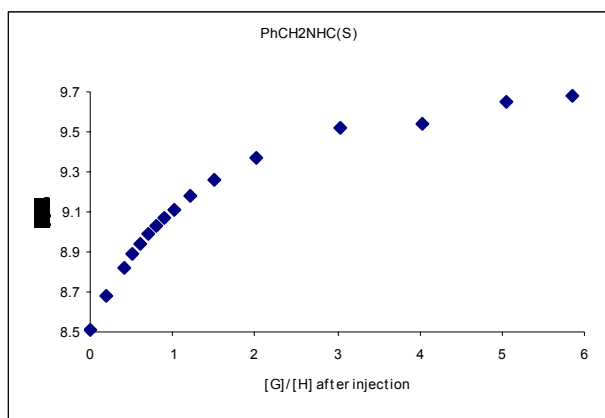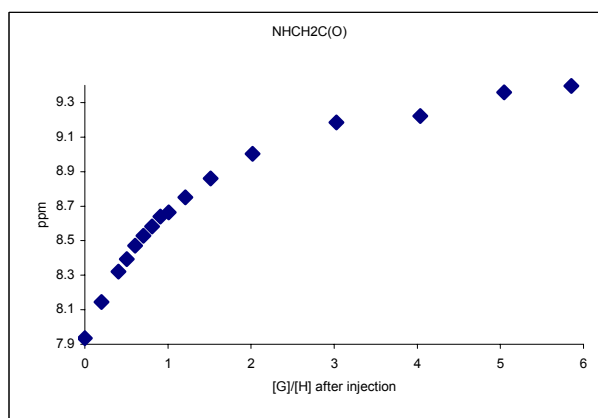

*ITC data*

|                     |      |                               |       |
|---------------------|------|-------------------------------|-------|
| [Host]/mM           | 1.20 | $\Delta H/\text{kJmol}^{-1}$  | -4.76 |
| [Guest]/mM          | 78.0 | $T\Delta S/\text{kJmol}^{-1}$ | 9.92  |
| $K_a/\text{M}^{-1}$ | 370  | $\Delta G/\text{kJmol}^{-1}$  | -14.7 |

| [G]/[H] after injection | cal/mol of injected G |
|-------------------------|-----------------------|
| 0.22                    | --                    |
| 0.45                    | -296.74               |
| 0.67                    | --                    |
| 0.90                    | -252.58               |
| 1.12                    | -230.79               |
| 1.35                    | -199.77               |
| 1.58                    | -184.97               |
| 1.80                    | -169.56               |
| 2.03                    | -146.85               |
| 2.26                    | -135.95               |
| 2.49                    | -126.48               |
| 2.72                    | -117.78               |
| 2.96                    | -108.83               |
| 3.19                    | -92.78                |
| 3.42                    | -78.58                |
| 3.66                    | -76.18                |
| 3.89                    | -70.73                |
| 4.13                    | -69.66                |
| 4.36                    | -62.97                |
| 4.60                    | -62.04                |
| 4.84                    | -57.20                |
| 5.08                    | -54.20                |
| 5.32                    | --                    |
| 5.56                    | -50.71                |
| 5.80                    | -46.02                |
| 6.04                    | -44.59                |
| 6.28                    | -39.47                |
| 6.53                    | -40.02                |
| 6.77                    | -36.84                |
| 7.01                    | -34.95                |
| 7.26                    | -36.09                |
| 7.51                    | -30.63                |
| 7.75                    | -31.54                |
| 8.00                    | -28.34                |
| 8.25                    | -27.74                |
| 8.50                    | -26.57                |
| 8.75                    | -23.18                |
| 9.00                    | -23.17                |
| 9.25                    | -21.74                |
| 9.50                    | -22.58                |

---

|       |        |
|-------|--------|
| 9.76  | -21.22 |
| 10.01 | -18.14 |
| 10.27 | -16.83 |
| 10.52 | -17.45 |
| 10.78 | -19.16 |
| 11.03 | -17.50 |
| 11.29 | -15.02 |
| 11.55 | -13.74 |
| 11.81 | -15.05 |
| 12.07 | -12.55 |

---

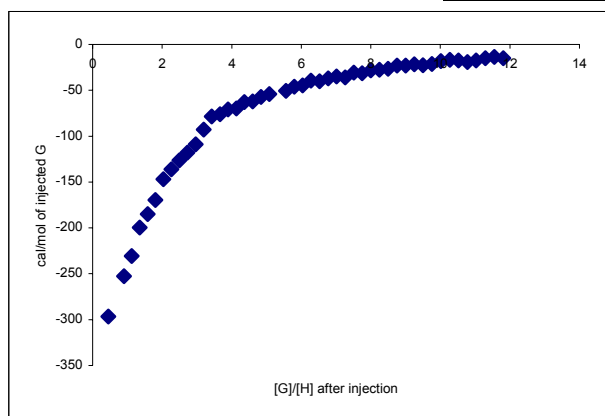



**N1-Benzyl-3-[(benzylamino)carbothieryl]aminopropanamide 13 and TBA acetate in DMSO**

*NMR data*

|            |      |                                     |     |
|------------|------|-------------------------------------|-----|
| [Host]/mM  | 5.1  | Starting volume/ $\mu\text{L}$      | 600 |
| [Guest]/mM | 30.5 | $K_a(\text{average})/\text{M}^{-1}$ | 230 |

| Volume added<br>/ $\mu\text{L}$ | C(O)NHCH <sub>2</sub> Ph | PhCH <sub>2</sub> NHC(S) | NHCH <sub>2</sub> Ph |
|---------------------------------|--------------------------|--------------------------|----------------------|
| 0                               | 8.7048                   | 8.256                    | 7.8262               |
| 20                              | 8.7231                   | 8.4331                   | 8.0121               |
| 40                              | 8.7413                   | 8.5817                   | 8.1734               |
| 50                              | 8.7461                   | 8.6428                   | 8.2385               |
| 60                              | 8.7501                   | 8.7000                   | 8.3036               |
| 70                              | 8.7580                   | 8.758                    | 8.3553               |
| 80                              | 8.7636                   | 8.7636                   | 8.4149               |
| 90                              | 8.7683                   | 8.8200                   | 8.4641               |
| 100                             | 8.7723                   | 8.8724                   | 8.5094               |
| 120                             | 8.7819                   | 8.9542                   | 8.6031               |
| 150                             | 8.7898                   | 9.0273                   | 8.7112               |
| 200                             | 8.8025                   | 9.1544                   | 8.8025               |
| 300                             | 8.8160                   | 9.3030                   | 8.9804               |
| 400                             | 8.8247                   | 9.3498                   | 9.0511               |
| 500                             | 8.8343                   | 9.4634                   | 9.1631               |
| 580                             | 8.8375                   | 9.4944                   | 9.1957               |
| $K_a$                           | $248 \text{ M}^{-1}$     | $209 \text{ M}^{-1}$     | $223 \text{ M}^{-1}$ |

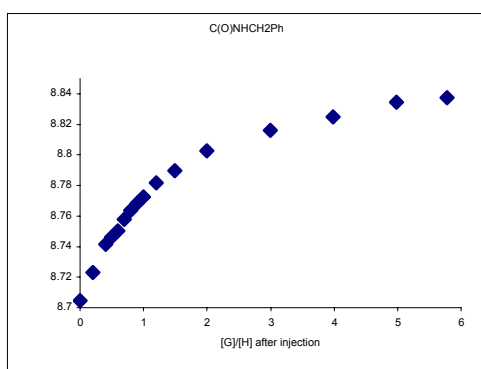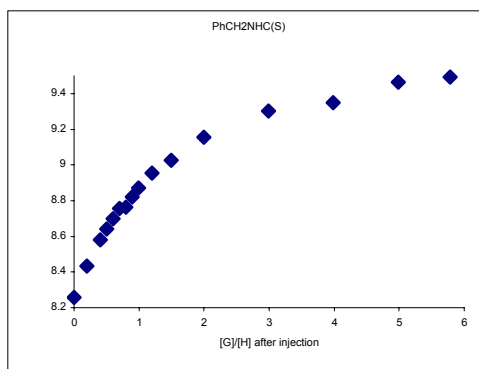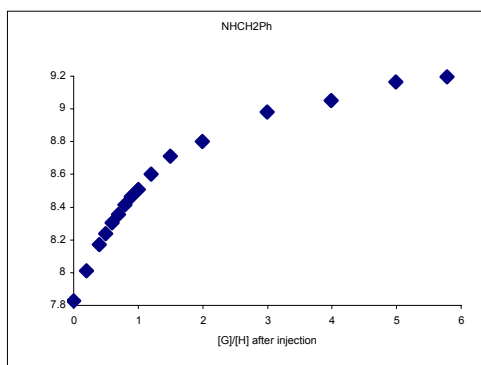

*ITC data*

|                     |      |                               |       |
|---------------------|------|-------------------------------|-------|
| [Host]/mM           | 1.99 | $\Delta H/\text{kJmol}^{-1}$  | -6.60 |
| [Guest]/mM          | 78.0 | $T\Delta S/\text{kJmol}^{-1}$ | 7.14  |
| $K_a/\text{M}^{-1}$ | 260  | $\Delta G/\text{kJmol}^{-1}$  | -13.7 |

| [G]/[H] after injection | cal/mol of injected G |
|-------------------------|-----------------------|
| 0.13                    | --                    |
| 0.26                    | -514.626              |
| 0.39                    | -457.022              |
| 0.52                    | --                    |
| 0.65                    | -388.796              |
| 0.78                    | -367.690              |
| 0.91                    | -340.101              |
| 1.05                    | -317.501              |
| 1.18                    | -293.019              |
| 1.31                    | -269.580              |
| 1.44                    | -259.711              |
| 1.58                    | -240.249              |
| 1.71                    | -229.256              |
| 1.85                    | -216.499              |
| 1.98                    | -202.599              |
| 2.12                    | -191.810              |
| 2.26                    | -180.826              |
| 2.39                    | -166.754              |
| 2.53                    | -159.788              |
| 2.67                    | -152.072              |
| 2.80                    | -142.377              |
| 2.94                    | -136.889              |
| 3.08                    | -130.758              |
| 3.22                    | -123.222              |
| 3.36                    | -120.534              |
| 3.50                    | -114.131              |
| 3.64                    | -110.623              |
| 3.78                    | -106.402              |
| 3.92                    | -99.945               |
| 4.07                    | -93.314               |
| 4.21                    | -87.726               |
| 4.35                    | -82.775               |
| 4.49                    | -80.215               |
| 4.64                    | -77.777               |
| 4.78                    | -75.812               |
| 4.93                    | -75.506               |
| 5.07                    | -70.955               |
| 5.22                    | -63.429               |
| 5.36                    | -61.416               |
| 5.51                    | -60.885               |

---

|      |         |
|------|---------|
| 5.66 | -58.181 |
| 5.80 | -54.218 |
| 5.95 | -57.548 |
| 6.10 | -56.781 |
| 6.25 | -52.106 |
| 6.40 | -47.927 |
| 6.55 | -44.137 |
| 6.70 | -39.558 |
| 6.85 | -40.659 |
| 7.00 | -38.701 |

---

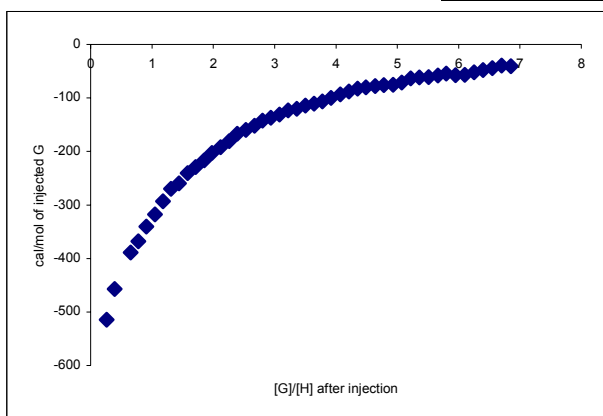

**N2-Methyl-6-([(benzylamino)carbothioyl]aminomethyl)-2-pyridinecarboxamide 21 and TBA acetate in DMSO**

*NMR data*

|            |      |                                     |     |
|------------|------|-------------------------------------|-----|
| [Host]/mM  | 3.2  | Starting volume/ $\mu\text{L}$      | 600 |
| [Guest]/mM | 31.8 | $K_a(\text{average})/\text{M}^{-1}$ | 370 |

| Volume added<br>$\mu\text{L}$ | MeNH                 | Thiourea-NH          | Thiourea-NH          |
|-------------------------------|----------------------|----------------------|----------------------|
| 0                             | 8.9539               | 8.4887               | 8.4196               |
| 20                            | 9.0789               | 8.8931               | 8.7580               |
| 40                            | 9.1973               | 9.1973               | 9.0519               |
| 50                            | 9.2378               | 9.4142               | 9.2378               |
| 60                            | 9.2855               | 9.5317               | 9.2855               |
| 70                            | 9.3196               | 9.6668               | 9.4094               |
| 80                            | 9.3474               | 9.7502               | 9.4801               |
| 90                            | 9.3864               | 9.8804               | 9.5770               |
| 100                           | 9.4078               | 9.9448               | 9.6572               |
| 120                           | 9.4491               | 10.0917              | 9.7700               |
| 150                           | 9.4968               | 10.2514              | 9.8955               |
| 200                           | 9.5603               | 10.4301              | 10.0433              |
| 300                           | 9.6159               | 10.6168              | 10.2061              |
| 400                           | 9.6564               | 10.7384              | 10.3110              |
| 500                           | 9.6660               | 10.7630              | 10.3277              |
| 580                           | 9.6795               | 10.8257              | 10.3817              |
| $K_a$                         | $364 \text{ M}^{-1}$ | $368 \text{ M}^{-1}$ | $373 \text{ M}^{-1}$ |

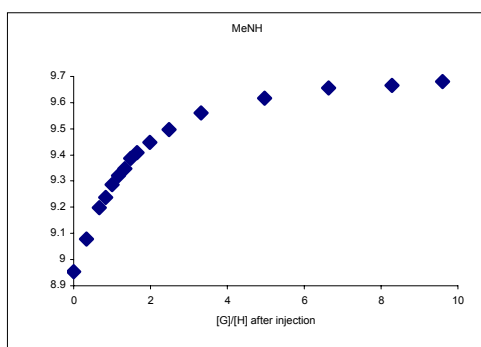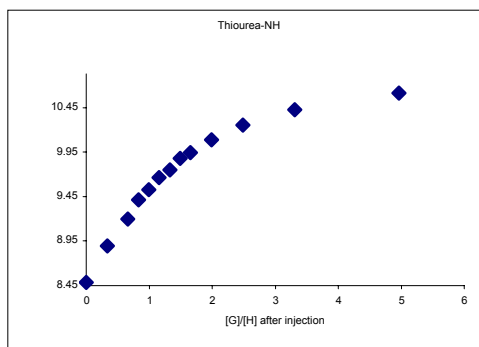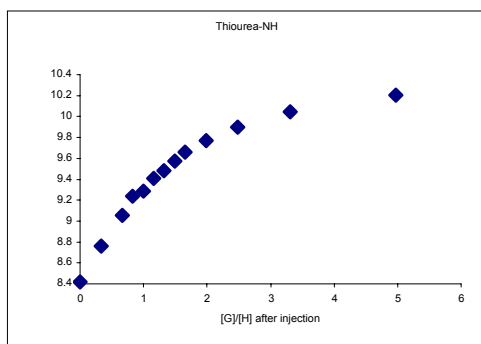

*ITC data*

|                     |      |                               |       |
|---------------------|------|-------------------------------|-------|
| [Host]/mM           | 2.06 | $\Delta H/\text{kJmol}^{-1}$  | -9.7  |
| [Guest]/mM          | 78.0 | $T\Delta S/\text{kJmol}^{-1}$ | 5.0   |
| $K_a/\text{M}^{-1}$ | 370  | $\Delta G/\text{kJmol}^{-1}$  | -14.7 |

| [G]/[H] after injection | cal/mol of injected G |
|-------------------------|-----------------------|
| 0.10                    | --                    |
| 0.26                    | -822.44               |
| 0.39                    | -800.75               |
| 0.52                    | -718.04               |
| 0.65                    | -745.96               |
| 0.79                    | -766.90               |
| 0.92                    | -696.91               |
| 1.05                    | -633.62               |
| 1.18                    | -574.20               |
| 1.32                    | -523.68               |
| 1.45                    | -479.94               |
| 1.59                    | -442.02               |
| 1.72                    | -407.56               |
| 1.86                    | -372.93               |
| 1.99                    | -347.24               |
| 2.13                    | -321.40               |
| 2.27                    | -290.81               |
| 2.40                    | -271.61               |
| 2.54                    | -250.14               |
| 2.68                    | -226.32               |
| 2.82                    | -214.25               |
| 2.96                    | -197.99               |
| 3.10                    | -189.47               |
| 3,24                    | -176.42               |
| 3,38                    | -160.32               |
| 3,52                    | -153.13               |
| 3,66                    | -146.35               |
| 3,80                    | -137.30               |
| 3,94                    | -125.42               |
| 4,09                    | -117.40               |
| 4,23                    | -108.60               |
| 4,37                    | -98.68                |
| 4,52                    | -96.92                |
| 4,66                    | -94.11                |
| 4,81                    | -85.20                |
| 4,95                    | -86.74                |
| 5,10                    | -73.64                |
| 5,24                    | -72.57                |
| 5,39                    | -69.21                |
| 5,54                    | -6199                 |
| 5,68                    | -63.80                |
| 5,83                    | -57.68                |
| 5,98                    | -52.49                |
| 6,13                    | -56.34                |
| 6,28                    | -48.16                |
| 6,43                    | -43.12                |
| 6,58                    | -42.48                |
| 6,73                    | -36.81                |
| 6,89                    | -32.22                |
| 7,03                    | -28.60                |

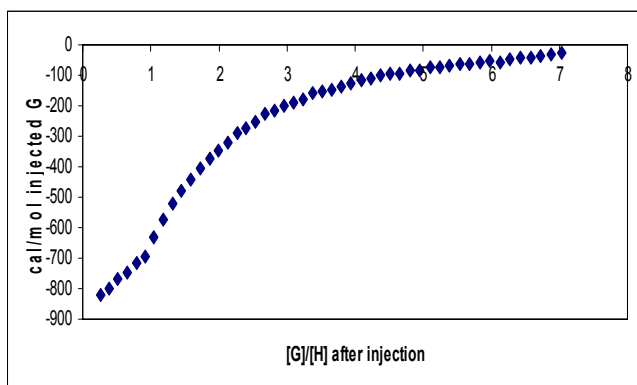

**N2-Methyl-6-[(2-(benzylamino)-2-oxoethyl)aminocarbothioyl]amino]methyl-2-pyridinecarboxamide 22 and TBA acetate in DMSO**

*NMR data*

|            |      |                                     |     |
|------------|------|-------------------------------------|-----|
| [Host]/mM  | 4.5  | Starting volume/ $\mu\text{L}$      | 600 |
| [Guest]/mM | 26.9 | $K_a(\text{average})/\text{M}^{-1}$ | 950 |

| Volume added<br>/ $\mu\text{L}$ | MeNH                 |
|---------------------------------|----------------------|
| 0                               | 8.7429               |
| 20                              | 8.7804               |
| 40                              | 8.8398               |
| 50                              | 8.8620               |
| 60                              | 8.8962               |
| 70                              | 8.9033               |
| 80                              | 8.9407               |
| 100                             | 8.9804               |
| 120                             | 9.0606               |
| 150                             | 9.1321               |
| 200                             | 9.2107               |
| 300                             | 9.3418               |
| 400                             | 9.3752               |
| 500                             | 9.3799               |
| $K_a$                           | $947 \text{ M}^{-1}$ |

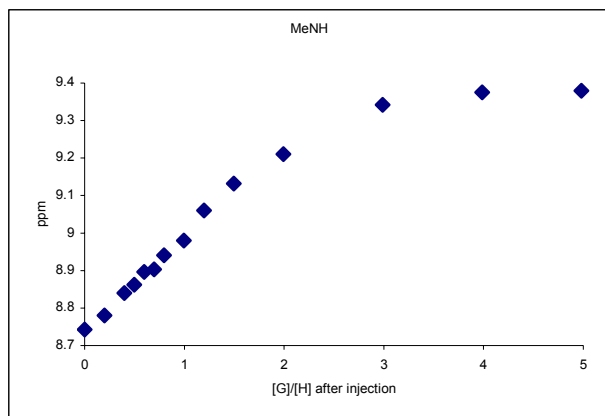



*ITC data*

|                     |      |                               |       |
|---------------------|------|-------------------------------|-------|
| [Host]/mM           | 2.02 | $\Delta H/\text{kJmol}^{-1}$  | -3.77 |
| [Guest]/mM          | 78.0 | $T\Delta S/\text{kJmol}^{-1}$ | 13.3  |
| $K_a/\text{M}^{-1}$ | 980  | $\Delta G/\text{kJmol}^{-1}$  | -17.1 |

| [G]/[H] after injection | cal/mol of injected G |
|-------------------------|-----------------------|
| 0.13                    | 715.51                |
| 0.27                    | 962.89                |
| 0.40                    | 989.12                |
| 0.53                    | 961.24                |
| 0.67                    | 929.41                |
| 0.80                    | 903.81                |
| 0.94                    | 877.00                |
| 1.08                    | 848.19                |
| 1.21                    | 823.15                |
| 1.35                    | 793.00                |
| 1.49                    | 766.93                |
| 1.63                    | 742.84                |
| 1.76                    | 717.38                |
| 1.90                    | 692.76                |
| 2.04                    | 668.80                |
| 2.18                    | 650.01                |
| 2.32                    | 629.50                |
| 2.46                    | 610.25                |
| 2.60                    | 592.91                |
| 2.75                    | 579.55                |
| 2.89                    | 562.17                |
| 3.03                    | 545.05                |
| 3.17                    | 531.93                |
| 3.32                    | 514.74                |
| 3.46                    | 503.28                |
| 3.61                    | 491.36                |
| 3.75                    | 479.13                |
| 3.90                    | 467.45                |
| 4.04                    | 456.29                |
| 4.19                    | 445.55                |
| 4.33                    | 432.68                |
| 4.48                    | 424.38                |
| 4.63                    | 418.69                |
| 4.78                    | 408.64                |
| 4.93                    | 401.80                |
| 5.07                    | 393.35                |
| 5.22                    | 386.07                |

---

|      |        |
|------|--------|
| 5.37 | 374.40 |
| 5.52 | 365.85 |
| 5.67 | 360.15 |
| 5.83 | 353.46 |
| 5.98 | 345.24 |
| 6.13 | 338.64 |
| 6.28 | 334.02 |
| 6.43 | 323.90 |
| 6.59 | 321.10 |
| 6.74 | 311.73 |
| 6.90 | 306.41 |
| 7.05 | 301.32 |
| 7.21 | 296.49 |

---

***N*2-Methyl-6-[(3-(benzylamino)-3-oxopropyl)aminocarbothioyl]amino]methyl-2-pyridinecarboxamide 23 and TBA acetate in DMSO***NMR data*

|            |      |                                     |      |
|------------|------|-------------------------------------|------|
| [Host]/mM  | 4.3  | Starting volume/ $\mu\text{L}$      | 600  |
| [Guest]/mM | 25.9 | $K_a(\text{average})/\text{M}^{-1}$ | 1740 |

| Volume added<br>/ $\mu\text{L}$ | $\text{ArCH}_2\text{NHC(S)}$ | $\text{NHCH}_2\text{CH}_2$ |
|---------------------------------|------------------------------|----------------------------|
| 0                               | 8.4514                       | 8.1154                     |
| 20                              | 8.7866                       | 8.5253                     |
| 40                              | 9.0202                       | 8.8120                     |
| 50                              | 9.1266                       | 8.9677                     |
| 60                              | 9.2156                       | 9.0909                     |
| 70                              | 9.3355                       | 9.1735                     |
| 80                              | 9.3760                       | 9.2672                     |
| 90                              | 9.3903                       | 9.3435                     |
| 100                             | 9.4245                       | 9.4245                     |
| 120                             | 9.5230                       | 9.5230                     |
| 150                             | 9.6040                       | 9.6040                     |
| 200                             | 9.7311                       | 9.7311                     |
| 300                             | 9.8749                       | 9.8749                     |
| 400                             | 9.9551                       | 9.9551                     |
| 500                             | 9.9511                       | 9.9511                     |
| $K_a$                           | $1430 \text{ M}^{-1}$        | $2050 \text{ M}^{-1}$      |

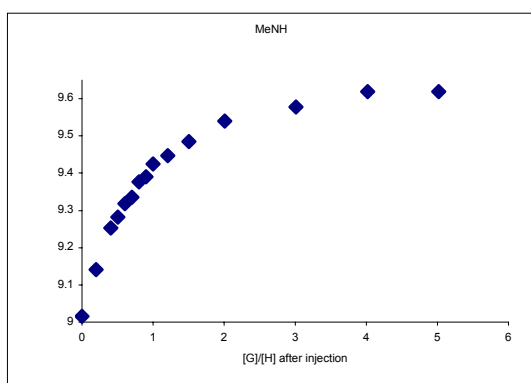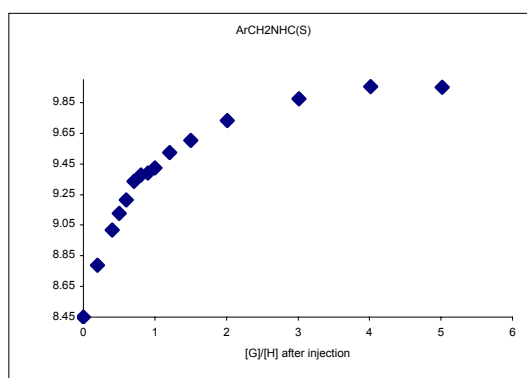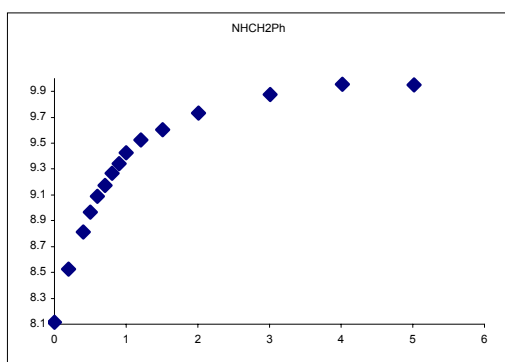

*ITC data*

|                     |                   |                               |       |
|---------------------|-------------------|-------------------------------|-------|
| [Host]/mM           | 1.95              | $\Delta H/\text{kJmol}^{-1}$  | -4.31 |
| [Guest]/mM          | 78.0              | $T\Delta S/\text{kJmol}^{-1}$ | 14.8  |
| $K_a/\text{M}^{-1}$ | $2.2 \times 10^3$ | $\Delta G/\text{kJmol}^{-1}$  | -19.1 |

| [G]/[H] after injection | cal/mol of injected G |
|-------------------------|-----------------------|
| 0.14                    | -639.52               |
| 0.27                    | -820.88               |
| 0.41                    | -818.21               |
| 0.55                    | -808.37               |
| 0.69                    | -800.23               |
| 0.83                    | -791.46               |
| 0.97                    | -780.77               |
| 1.11                    | -766.85               |
| 1.25                    | -750.47               |
| 1.39                    | -739.20               |
| 1.53                    | -729.74               |
| 1.68                    | -716.38               |
| 1.82                    | -695.91               |
| 1.96                    | -681.28               |
| 2.11                    | -674.62               |
| 2.25                    | -655.45               |
| 2.39                    | -636.97               |
| 2.54                    | -628.15               |
| 2.68                    | -609.90               |
| 2.83                    | -599.97               |
| 2.98                    | -587.93               |
| 3.12                    | -575.26               |
| 3.27                    | -563.55               |
| 3.42                    | -553.26               |
| 3.57                    | -541.80               |
| 3.72                    | -529.72               |
| 3.87                    | -523.22               |
| 4.02                    | -514.86               |
| 4.17                    | -508.76               |
| 4.32                    | -496.10               |
| 4.47                    | -484.09               |
| 4.62                    | -474.49               |
| 4.77                    | -463.85               |
| 4.92                    | -455.07               |
| 5.08                    | -448.81               |
| 5.23                    | -443.83               |
| 5.38                    | -429.97               |
| 5.54                    | -425.60               |
| 5.69                    | -419.74               |
| 5.85                    | -414.23               |

---

|      |         |
|------|---------|
| 6.00 | -404.08 |
| 6.16 | -401.34 |
| 6.32 | -394.21 |
| 6.47 | -384.81 |
| 6.63 | -379.08 |
| 6.79 | -373.09 |
| 6.95 | -365.56 |
| 7.11 | -364.21 |
| 7.27 | -359.39 |
| 7.43 | -357.17 |

---

***N*1-Methyl-3-[(ammonio[2-(benzylamino)-2-oxoethyl]aminomethyl)amino]methylbenzamide  
hexafluorophosphate 27 and TBA acetate in DMSO**

*ITC data*

|                          |       |                          |       |
|--------------------------|-------|--------------------------|-------|
| [Host]/mM                | 1.00  | [Guest]/mM               | 48.0  |
| $K_a^1/M^{-1}$           | 6900  | $K_a^2/M^{-1}$           | 130   |
| $\Delta H^1/kJmol^{-1}$  | -19.6 | $\Delta H^2/kJmol^{-1}$  | -51.8 |
| $T\Delta S^1/kJmol^{-1}$ | 2.3   | $T\Delta S^2/kJmol^{-1}$ | -39.7 |
| $\Delta G^1/kJmol^{-1}$  | -21.9 | $\Delta G^2/kJmol^{-1}$  | -12.0 |

| [H]/[G] after injection | cal/mol of injected G |
|-------------------------|-----------------------|
| 0.16                    | --                    |
| 0.33                    | -3803.86              |
| 0.50                    | -3633.58              |
| 0.66                    | -3405.39              |
| 0.83                    | -3142.99              |
| 1.00                    | -2835.03              |
| 1.16                    | -2513.61              |
| 1.33                    | -2190.81              |
| 1.50                    | -1917.11              |
| 1.67                    | -1701.98              |
| 1.84                    | -1558.07              |
| 2.01                    | -1456.14              |
| 2.18                    | -1397.21              |
| 2.35                    | -1312.05              |
| 2.53                    | -1200.59              |
| 2.70                    | -1105.44              |
| 2.87                    | -1030.77              |
| 3.05                    | -978.23               |
| 3.22                    | -930.19               |
| 3.40                    | -891.16               |
| 3.57                    | -847.28               |
| 3.75                    | -811.61               |
| 3.93                    | -778.95               |
| 4.10                    | -752.83               |
| 4.28                    | -739.68               |
| 4.46                    | -714.24               |
| 4.64                    | -687.93               |
| 4.82                    | -663.37               |
| 5.00                    | -641.78               |
| 5.18                    | -629.93               |
| 5.36                    | -608.90               |
| 5.54                    | -593.49               |

---

|      |         |
|------|---------|
| 5.73 | -578.00 |
| 5.91 | -566.14 |
| 6.09 | -550.69 |
| 6.28 | -533.86 |
| 6.46 | -524.43 |
| 6.65 | -512.88 |
| 6.83 | -501.17 |
| 7.02 | -493.70 |
| 7.21 | -484.77 |
| 7.39 | -472.75 |
| 7.58 | -459.66 |
| 7.77 | -453.58 |
| 7.96 | -441.09 |
| 8.15 | -438.13 |
| 8.34 | -432.19 |
| 8.53 | -424.01 |
| 8.72 | -418.32 |
| 8.91 | -408.89 |

---

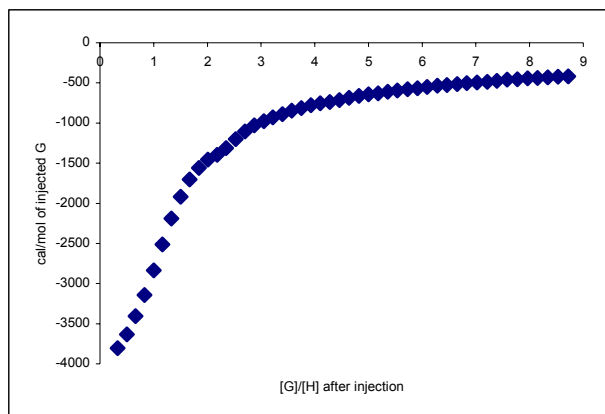

**N1-Methyl-3-[(ammonio[3-(benzylamino)-3-oxopropyl]aminomethyl)amino]methyl  
benzamidehexafluorophosphate 28 and TBA acetate in DMSO**

*ITC data*

|                          |                   |                          |       |
|--------------------------|-------------------|--------------------------|-------|
| [Host]/mM                | 1.25              | [Guest]/mM               | 48.0  |
| $K_a^1/M^{-1}$           | $5.3 \times 10^3$ | $K_a^2/M^{-1}$           | 70    |
| $\Delta H^1/kJmol^{-1}$  | -19.4             | $\Delta H^2/kJmol^{-1}$  | -43.8 |
| $T\Delta S^1/kJmol^{-1}$ | 1.8               | $T\Delta S^2/kJmol^{-1}$ | -33.5 |
| $\Delta G^1/kJmol^{-1}$  | -21.3             | $\Delta G^2/kJmol^{-1}$  | -10.4 |

| [H]/[G] after<br>injection | cal/mol of<br>injected G |
|----------------------------|--------------------------|
| 0.13                       | --                       |
| 0.26                       | -3833.02                 |
| 0.40                       | -3679.64                 |
| 0.53                       | -3468.25                 |
| 0.66                       | -3238.77                 |
| 0.80                       | -2939.42                 |
| 0.93                       | -2628.23                 |
| 1.07                       | -2287.00                 |
| 1.20                       | -1976.70                 |
| 1.34                       | -1722.09                 |
| 1.47                       | -1544.85                 |
| 1.61                       | -1436.82                 |
| 1.75                       | -1368.01                 |
| 1.88                       | -1232.94                 |
| 2.02                       | -1108.07                 |
| 2.16                       | -1009.39                 |
| 2.30                       | -937.17                  |
| 2.44                       | -881.18                  |
| 2.58                       | -829.86                  |
| 2.72                       | -790.22                  |
| 2.86                       | -751.86                  |
| 3.00                       | -718.03                  |
| 3.14                       | -685.65                  |
| 3.28                       | -663.54                  |
| 3.42                       | -648.30                  |
| 3.57                       | -626.64                  |
| 3.71                       | -601.32                  |
| 3.85                       | -579.90                  |
| 4.00                       | -563.09                  |
| 4.14                       | -549.27                  |
| 4.29                       | -533.89                  |



|      |         |
|------|---------|
| 4.43 | -520.15 |
| 4.58 | -507.79 |
| 4.73 | -494.01 |
| 4.87 | -481.05 |
| 5.02 | -470.80 |
| 5.17 | -459.82 |
| 5.32 | -453.51 |
| 5.47 | -445.04 |
| 5.61 | -434.55 |
| 5.76 | -425.78 |
| 5.91 | -415.71 |
| 6.06 | -408.62 |
| 6.22 | -398.35 |
| 6.37 | -390.79 |
| 6.52 | -385.44 |
| 6.67 | -380.18 |
| 6.82 | -373.69 |
| 6.98 | -367.56 |
| 7.13 | -359.50 |

---

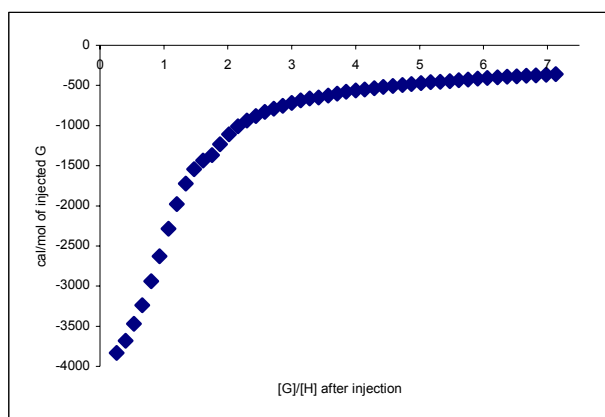

**N2-Methyl-6-[(ammonio[3-(benzylamino)-3-oxopropyl]aminomethyl)amino]methyl-2-pyridinecarboxamide hexafluorophosphate 33 and TBA acetate in DMSO**

*ITC data*

|                          |                   |                         |       |
|--------------------------|-------------------|-------------------------|-------|
| [Host]/mM                | 1.17              | [Guest]/mM              | 48.0  |
| $K_a^1/M^{-1}$           | $2.2 \times 10^4$ | $\Delta H^1/kJmol^{-1}$ | -8.0  |
| $T\Delta S^1/kJmol^{-1}$ | 16.8              | $\Delta G^1/kJmol^{-1}$ | -24.8 |

| [H]/[G] after injection | cal/mol of injected G |
|-------------------------|-----------------------|
| 0.14                    | --                    |
| 0.27                    | --                    |
| 0.41                    | -1759.25              |
| 0.55                    | -1726.12              |
| 0.69                    | -1652.39              |
| 0.83                    | -1389.76              |
| 0.97                    | -1013.43              |
| 1.11                    | -719.70               |
| 1.25                    | -512.77               |
| 1.39                    | -382.22               |
| 1.53                    | -289.09               |
| 1.68                    | -227.40               |
| 1.82                    | -191.63               |
| 1.96                    | -168.05               |
| 2.11                    | -140.79               |
| 2.25                    | -125.74               |
| 2.39                    | -112.07               |
| 2.54                    | -99.00                |
| 2.68                    | -93.86                |
| 2.83                    | -78.51                |
| 2.98                    | -75.67                |
| 3.12                    | -69.38                |
| 3.27                    | -54.92                |
| 3.42                    | -61.13                |
| 3.57                    | -60.00                |
| 3.72                    | -57.71                |
| 3.87                    | -52.46                |
| 4.02                    | -49.37                |
| 4.17                    | -48.60                |
| 4.32                    | -47.69                |
| 4.47                    | -42.04                |
| 4.62                    | -41.44                |
| 4.77                    | -36.06                |
| 4.92                    | -36.09                |
| 5.08                    | -37.50                |
| 5.23                    | -35.82                |

---

|      |        |
|------|--------|
| 5.38 | -34.40 |
| 5.54 | -28.81 |
| 5.69 | -35.26 |
| 5.85 | -28.43 |
| 6.00 | -32.19 |
| 6.16 | -31.92 |
| 6.32 | -27.99 |
| 6.47 | -23.07 |
| 6.63 | -27.37 |
| 6.79 | -28.21 |
| 6.95 | -25.68 |
| 7.11 | -26.57 |
| 7.27 | -25.86 |
| 7.43 | -23.99 |

---

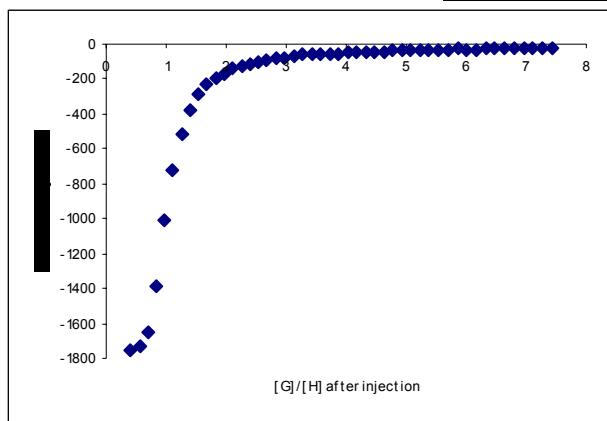

**N2-Methyl-6-[(ammonio[3-(benzylamino)-3-oxopropyl]aminomethyl)amino]methyl-2-pyridinecarboxamide hexafluorophosphate 33 and TBA acetate in 10% $\text{H}_2\text{O}/\text{DMSO}$**

*ITC data*

|                                 |                   |                                |       |
|---------------------------------|-------------------|--------------------------------|-------|
| [Host]/mM                       | 1.17              | [Guest]/mM                     | 48.0  |
| $K_a^1/\text{M}^{-1}$           | $5.5 \times 10^3$ | $\Delta H^1/\text{kJmol}^{-1}$ | -1.90 |
| $T\Delta S^1/\text{kJmol}^{-1}$ | 19.4              | $\Delta G^1/\text{kJmol}^{-1}$ | -21.3 |

| [G]/[H] after injection | cal/mol of injected G |
|-------------------------|-----------------------|
| 0.21                    | -262.03               |
| 0.31                    | -237.14               |
| 0.42                    | -222.56               |
| 0.52                    | -204.50               |
| 0.62                    | -185.53               |
| 0.73                    | -168.40               |
| 0.83                    | -151.72               |
| 0.94                    | -141.43               |
| 1.04                    | -128.26               |
| 1.15                    | -118.70               |
| 1.26                    | -105.15               |
| 1.36                    | -97.27                |
| 1.47                    | -88.34                |
| 1.58                    | -82.67                |
| 1.69                    | -74.87                |
| 1.80                    | -72.03                |
| 1.90                    | -64.05                |
| 2.01                    | -60.40                |
| 2.12                    | -56.14                |
| 2.23                    | -49.96                |
| 2.34                    | -45.51                |
| 2.45                    | -42.62                |
| 2.56                    | -39.69                |
| 2.68                    | -36.94                |
| 2.79                    | -33.83                |
| 2.9                     | -33.43                |
| 3.01                    | -29.46                |
| 3.12                    | -26.03                |
| 3.24                    | -22.34                |
| 3.35                    | -22.16                |
| 3.46                    | -19.45                |
| 3.58                    | -15.38                |
| 3.69                    | -17.00                |
| 3.81                    | -16.19                |
| 3.92                    | -13.18                |
| 4.04                    | -13.02                |
| 4.15                    | -13.06                |
| 4.27                    | -10.99                |
| 4.39                    | -8.21                 |

|      |       |
|------|-------|
| 4.50 | -8.04 |
| 4.62 | -7.16 |
| 4.74 | -6.07 |
| 4.86 | -5.32 |
| 4.97 | -3.28 |
| 5.09 | -1.38 |
| 5.21 | -4.02 |
| 5.33 | -1.44 |
| 5.45 | -0.86 |
| 5.57 | 0     |

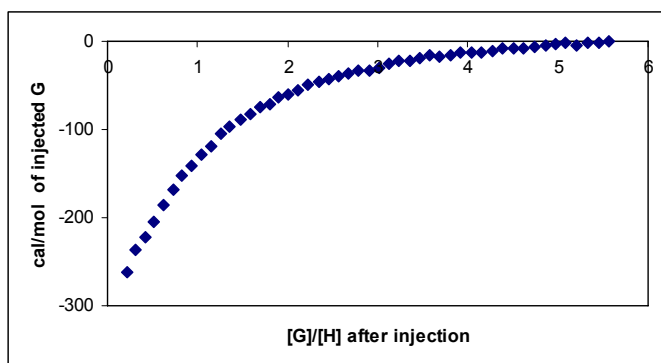

**N2-Methyl-6-[(ammonio[3-(benzylamino)-3-oxopropyl]aminomethyl)amino]methyl-2-pyridinecarboxamide hexafluorophosphate 33 and TBA acetate in 30% $\text{H}_2\text{O}/\text{DMSO}$** *ITC data*

|                            |      |                                            |       |
|----------------------------|------|--------------------------------------------|-------|
| [Host]/mM                  | 1.17 | $\Delta\text{H}/\text{kJmol}^{-1}$         | -2.0  |
| [Guest]/mM                 | 48.0 | $\text{T}\Delta\text{S}/\text{kJmol}^{-1}$ | 13.3  |
| $\text{K}_a/\text{M}^{-1}$ | 480  | $\Delta\text{G}/\text{kJmol}^{-1}$         | -15.3 |

| [G]/[H] after injection | cal/mol of injected G |
|-------------------------|-----------------------|
| 0,14                    | -324,771              |
| 0,21                    | -304,974              |
| 0,26                    | -282,438              |
| 0,34                    | -262,064              |
| 0,42                    | -241,52               |
| 0,48                    | -221,36               |
| 0,55                    | -200,97               |
| 0,62                    | -187,78               |
| 0,70                    | -173,09               |
| 0,77                    | -159,61               |
| 0,84                    | -147,53               |
| 0,91                    | -136,69               |
| 0,98                    | -127,00               |
| 1,05                    | -117,64               |
| 1,12                    | -107,57               |
| 1,20                    | -97,05                |
| 1,27                    | -91,63                |
| 1,34                    | -84,41                |
| 1,41                    | -81,05                |
| 1,49                    | -75,33                |
| 1,56                    | -65,15                |
| 1,64                    | -61,57                |
| 1,71                    | -58,27                |
| 1,78                    | -54,22                |
| 1,86                    | -50,07                |
| 1,93                    | -47,06                |
| 2,01                    | -43,30                |
| 2,08                    | -39,40                |
| 2,16                    | -38,32                |
| 2,23                    | -32,94                |
| 2,31                    | -30,04                |
| 2,39                    | -26,51                |
| 2,46                    | -27,37                |
| 2,54                    | -25,02                |
| 2,61                    | -21,60                |
| 2,69                    | -19,43                |
| 2,77                    | -17,12                |
| 2,85                    | -16,31                |
| 2,92                    | -13,53                |
| 3,00                    | -11,93                |

---

|      |        |
|------|--------|
| 3,08 | -10,90 |
| 3,16 | -10,36 |
| 3,24 | -10,34 |
| 3,32 | -6,71  |
| 3,39 | -6,26  |
| 3,47 | -3,18  |
| 3,55 | -3,17  |
| 3,63 | -2,69  |
| 3,71 | -0,93  |

---

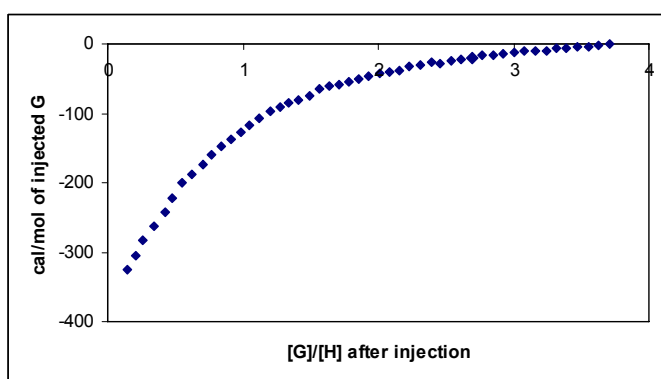

**Di(benzylamino)methylene]ammonium hexafluorophosphate and TBA acetate in DMSO**

*ITC data*

|                          |                   |                          |       |
|--------------------------|-------------------|--------------------------|-------|
| [Host]/mM                | 1.00              | [Guest]/mM               | 48.0  |
| $K_a^1/M^{-1}$           | $3.1 \times 10^3$ | $K_a^2/M^{-1}$           | 30    |
| $\Delta H^1/kJmol^{-1}$  | -21.8             | $\Delta H^2/kJmol^{-1}$  | -46.4 |
| $T\Delta S^1/kJmol^{-1}$ | -1.8              | $T\Delta S^2/kJmol^{-1}$ | -37.6 |
| $\Delta G^1/kJmol^{-1}$  | -19.9             | $\Delta G^2/kJmol^{-1}$  | -8.9  |

| [H]/[G] after injection | cal/mol of injected G |
|-------------------------|-----------------------|
| 0.16                    | --                    |
| 0.33                    | -3684.98              |
| 0.50                    | -3285.25              |
| 0.66                    | -2862.15              |
| 0.83                    | -2450.29              |
| 1.00                    | -2074.87              |
| 1.16                    | -1777.55              |
| 1.33                    | -1607.48              |
| 1.50                    | -1480.68              |
| 1.67                    | -1215.86              |
| 1.84                    | -1034.12              |
| 2.01                    | -901.01               |
| 2.18                    | -804.05               |
| 2.35                    | -728.03               |
| 2.53                    | -667.13               |
| 2.70                    | -612.91               |
| 2.87                    | -564.68               |
| 3.05                    | -524.42               |
| 3.22                    | -494.68               |
| 3.40                    | -461.81               |
| 3.57                    | -439.18               |
| 3.75                    | -418.27               |
| 3.93                    | -385.92               |
| 4.10                    | -383.46               |
| 4.28                    | -363.72               |
| 4.46                    | -351.42               |
| 4.64                    | -338.65               |
| 4.82                    | -323.22               |
| 5.00                    | -315.15               |
| 5.18                    | -313.16               |



|      |         |
|------|---------|
| 5.36 | -295.30 |
| 5.54 | -282.85 |
| 5.73 | -270.24 |
| 5.91 | -267.53 |
| 6.09 | -260.13 |
| 6.28 | -253.02 |
| 6.46 | -250.08 |
| 6.65 | -238.91 |
| 6.83 | -238.13 |
| 7.02 | -227.74 |
| 7.21 | -219.33 |
| 7.39 | -215.67 |
| 7.58 | -209.74 |
| 7.77 | -201.00 |
| 7.96 | -197.84 |
| 8.15 | -193.41 |
| 8.34 | -189.92 |
| 8.53 | -186.48 |
| 8.72 | -181.80 |
| 8.91 | -178.29 |

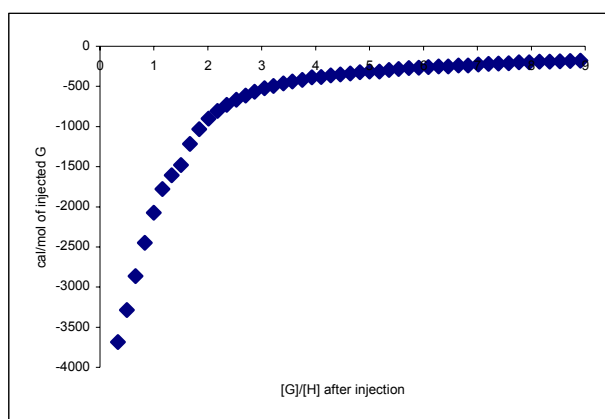

Supplement: b700988g.pdf [file b700988g.pdf]
